# Supplementary material for: Practical stability of Au25(SR)18−1/0/+1
Source: Royal Society of Chemistry journal article supplement (doi:10.1039/c7ra07511a), 2017-01-01

## Practical Stability of $\text{Au}_{25}(\text{SR})_{18}^{-1/0/+1}$

*Christian B. Collins, Marcus A. Tofanelli<sup>†</sup>, Michelle F. Crook<sup>††</sup>, Billy D. Phillips, Christopher J. Ackerson<sup>\*</sup>*

Department of Chemistry, Colorado State University

### Contents

|                                                                                 |    |
|---------------------------------------------------------------------------------|----|
| UV/Vis Spectra .....                                                            | 2  |
| Decomposition in stabilized and unstabilized THF under argon and air .....      | 2  |
| Decomposition in various solvents of the 0 charge state in air .....            | 7  |
| Decomposition of 0 charge state with different ligands in DCM under argon ..... | 10 |
| Linear fits of rate laws to the absorbance data .....                           | 12 |
| Summary of reactant order determination .....                                   | 16 |
| Differential Scanning calorimetry data .....                                    | 17 |

## UV/Vis Spectra

UV/Vis spectra were collected on an HP 8452A Diode Array Spectrophotometer, a ThermoFisher NanoDrop spectrophotometer in all other cases. Data were analyzed using Microsoft Excel.

Decomposition in stabilized and unstabilized THF under argon and air

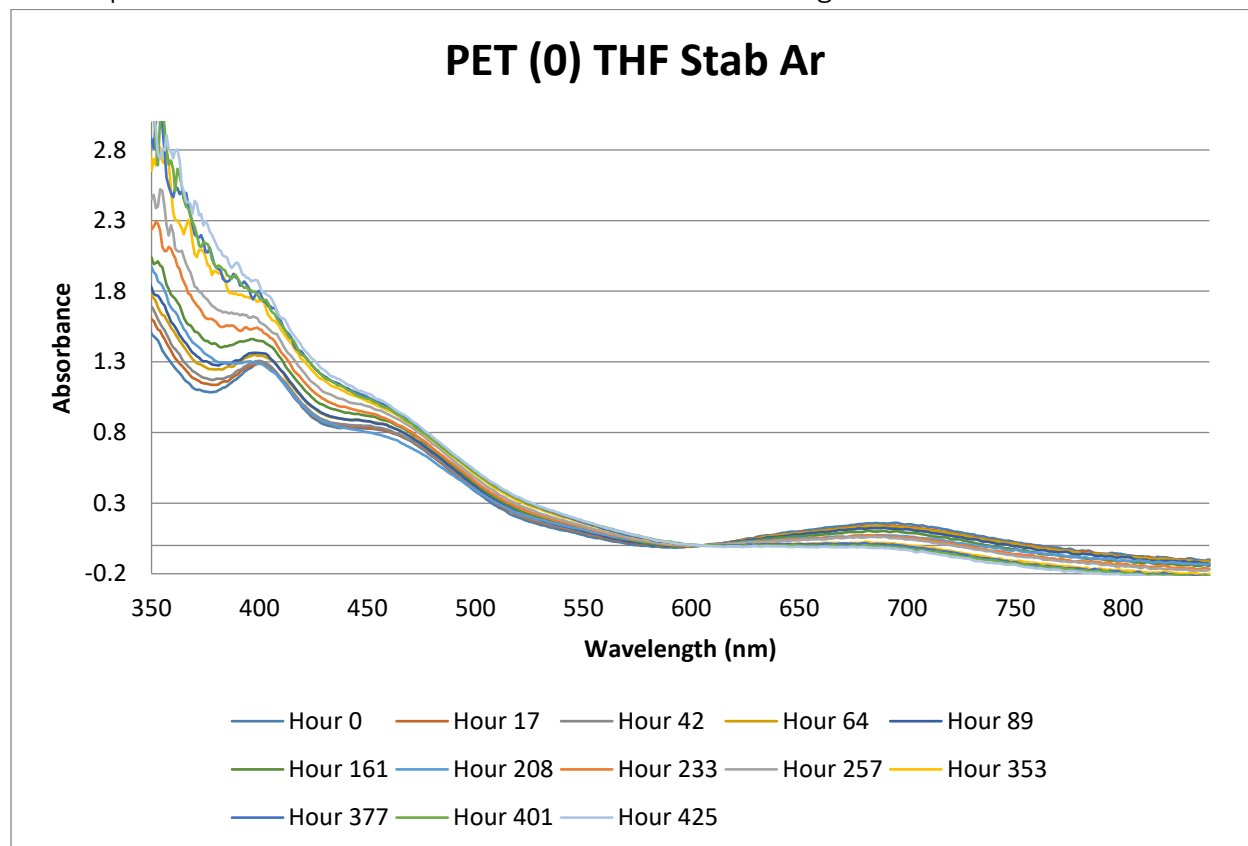

### PET (0) THF Ar

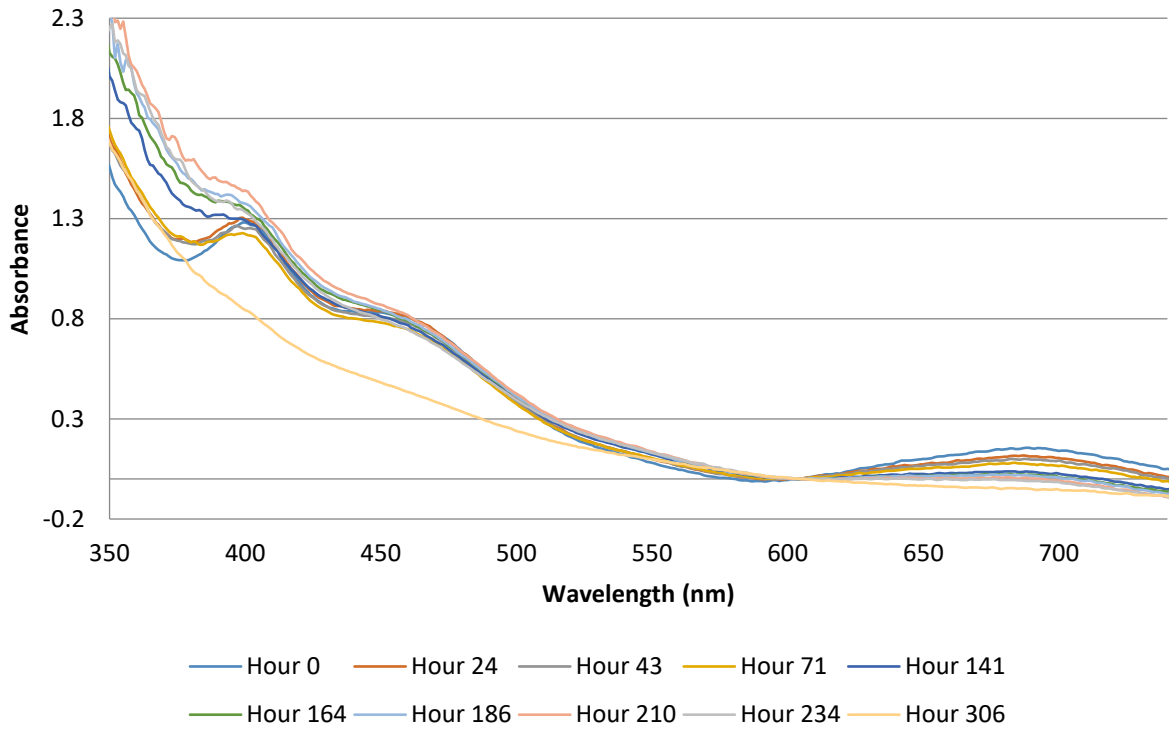

### Butanethiol (0) THF Air

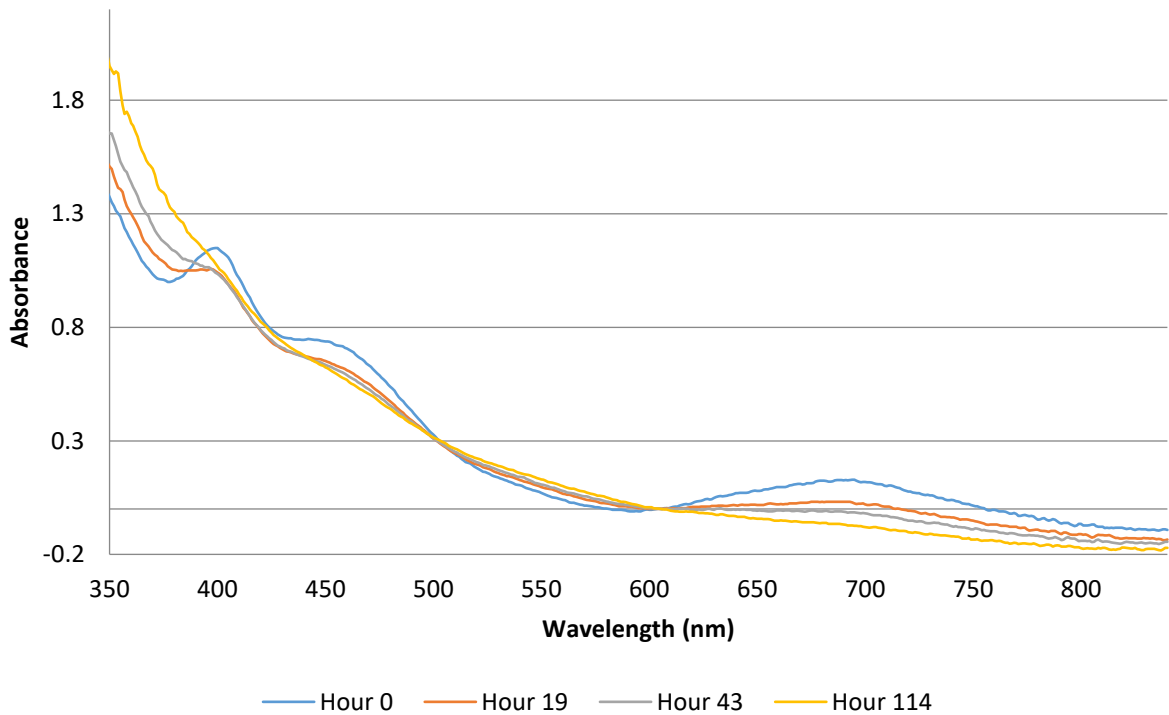

### Octanethiol (0) THF Air

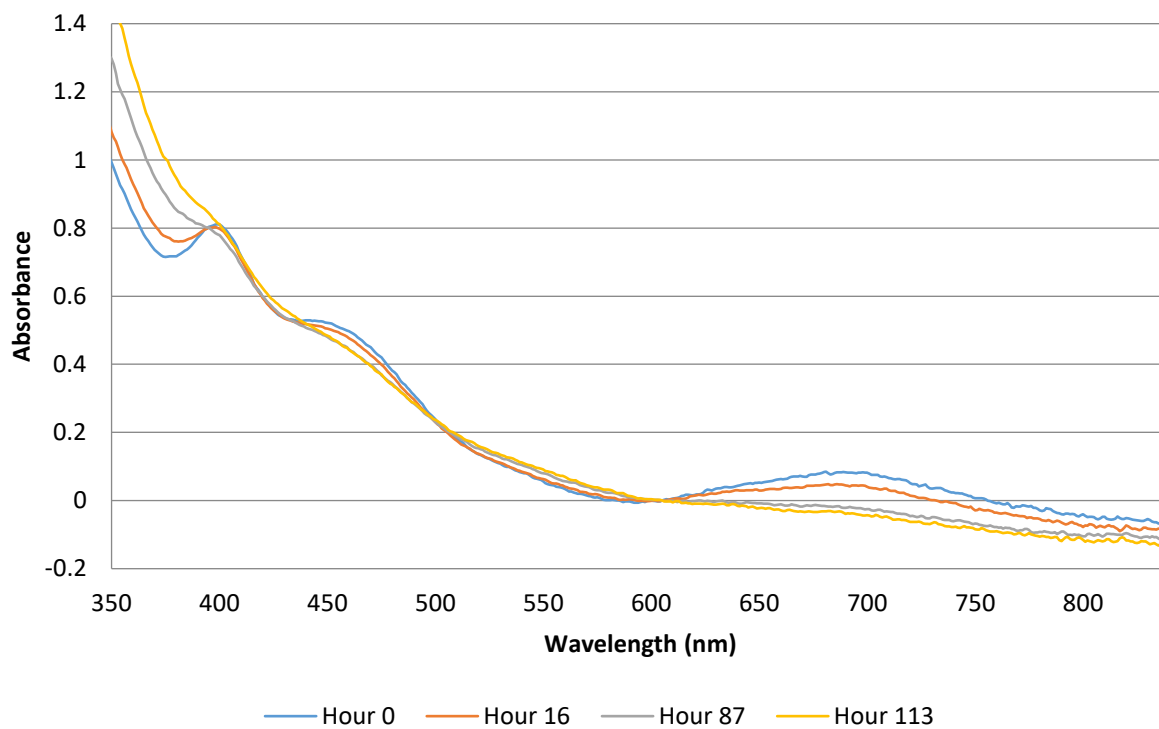

### butanethiol (0) THF stab in Air

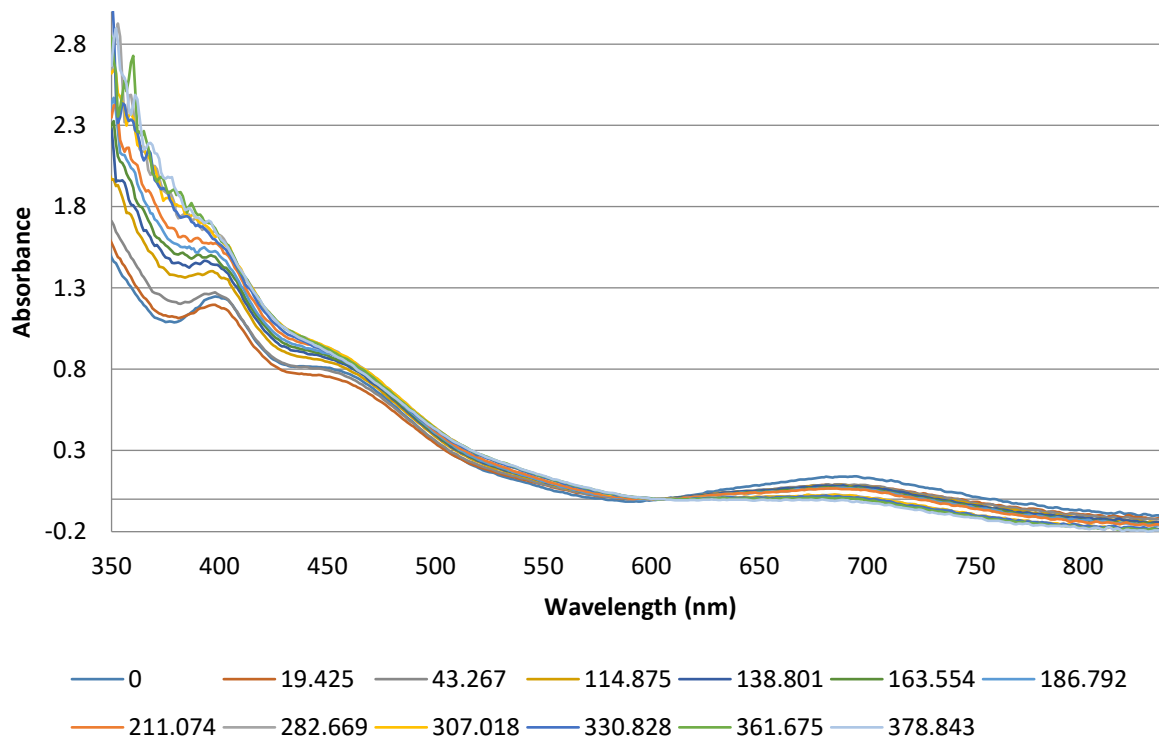

### Octanethiol (0) THF Stab Air

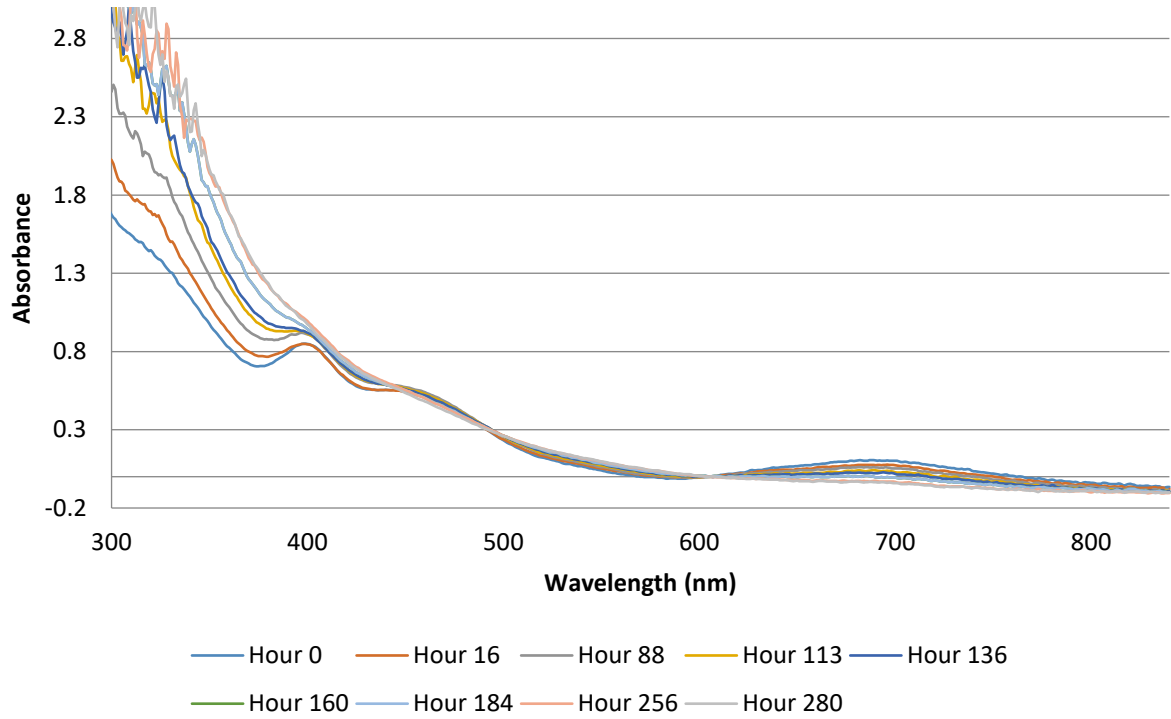

### PET (0) THF Ar

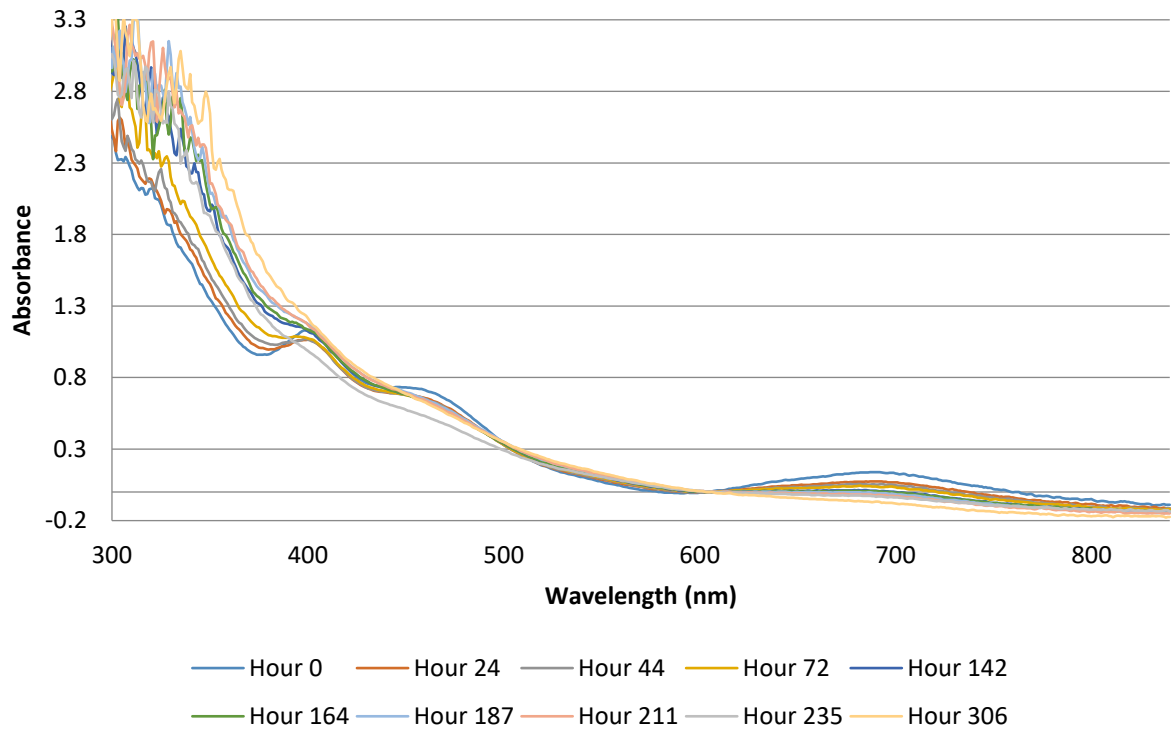

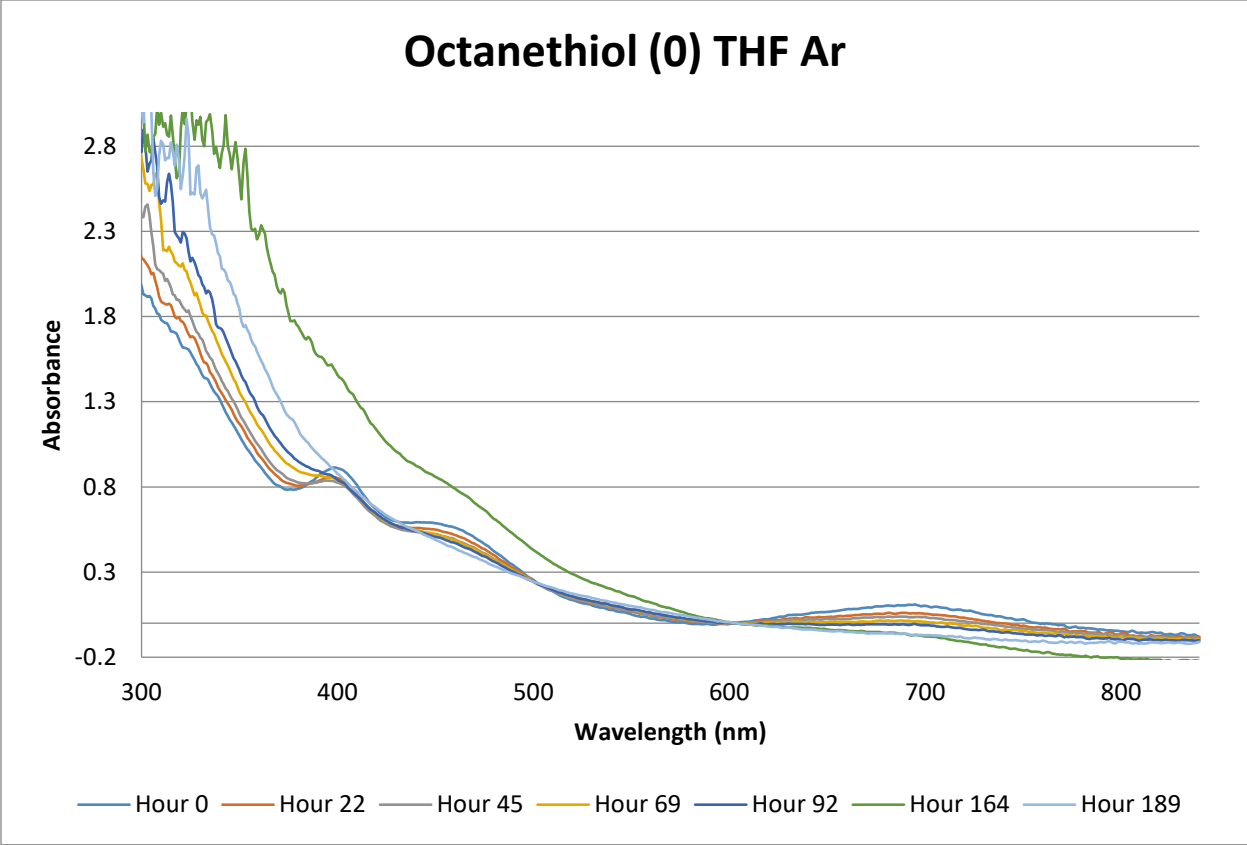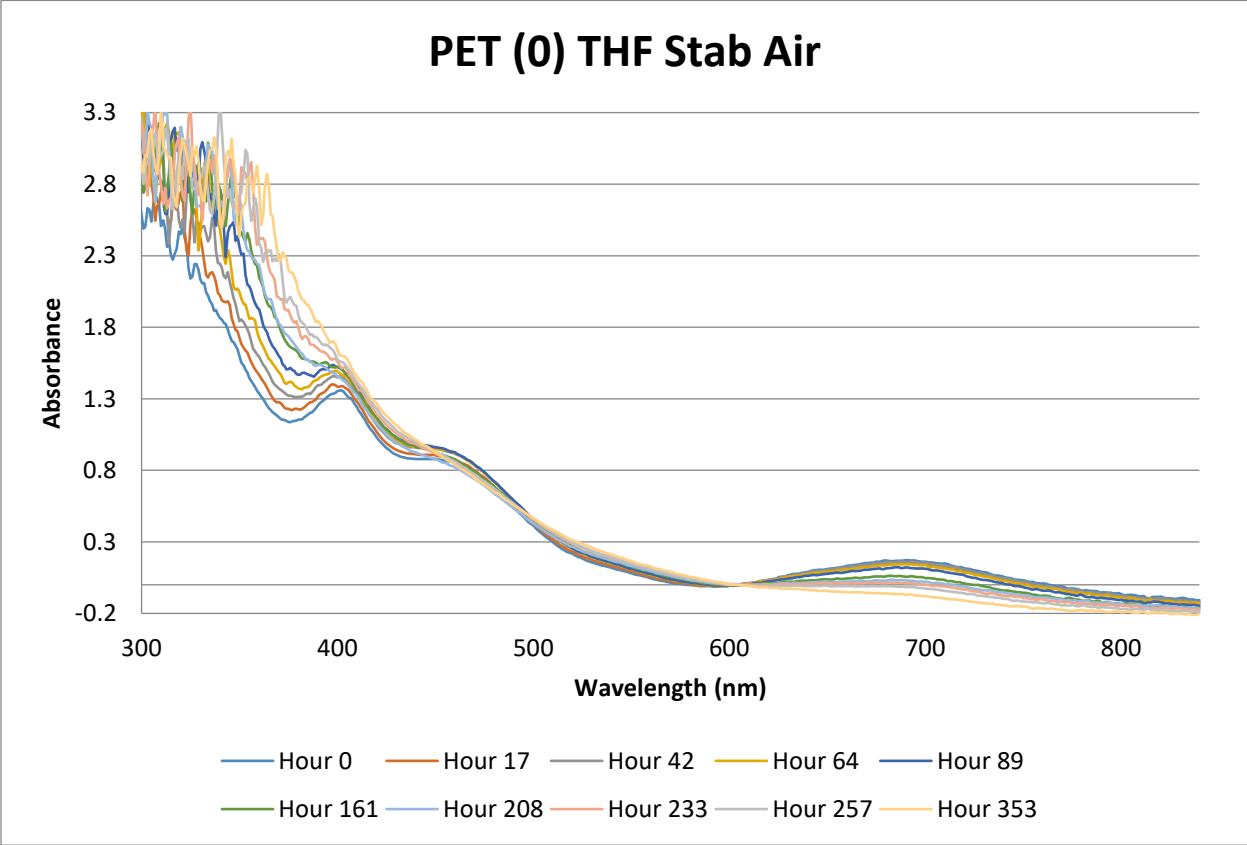

Decomposition in various solvents of the 0 charge state in air

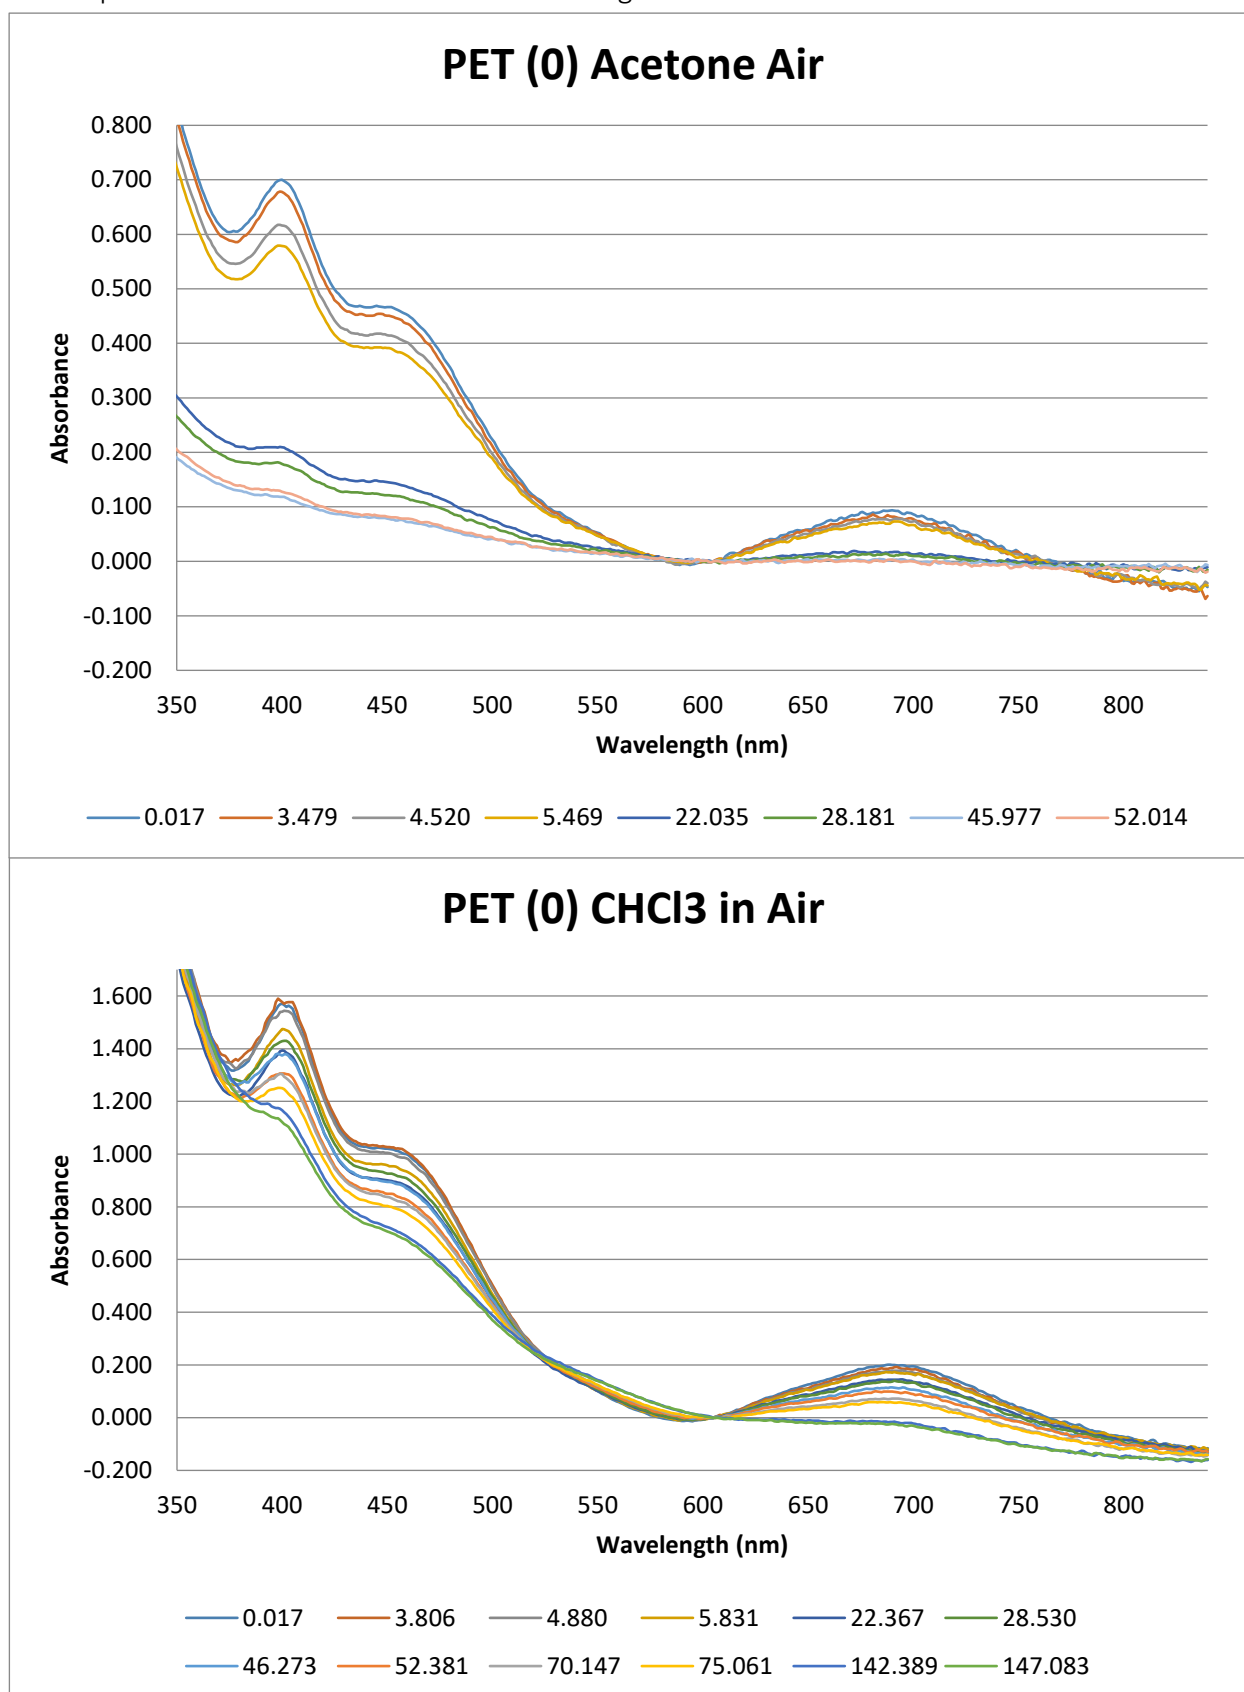

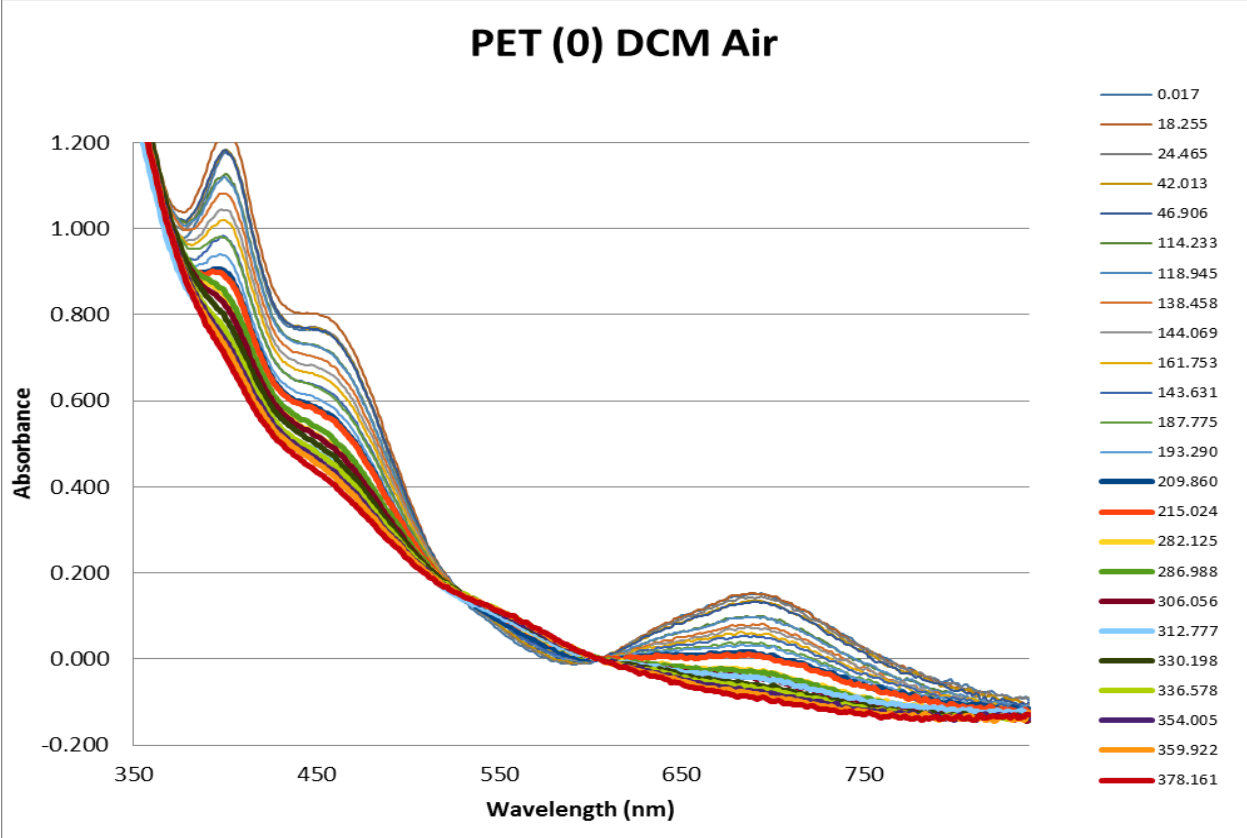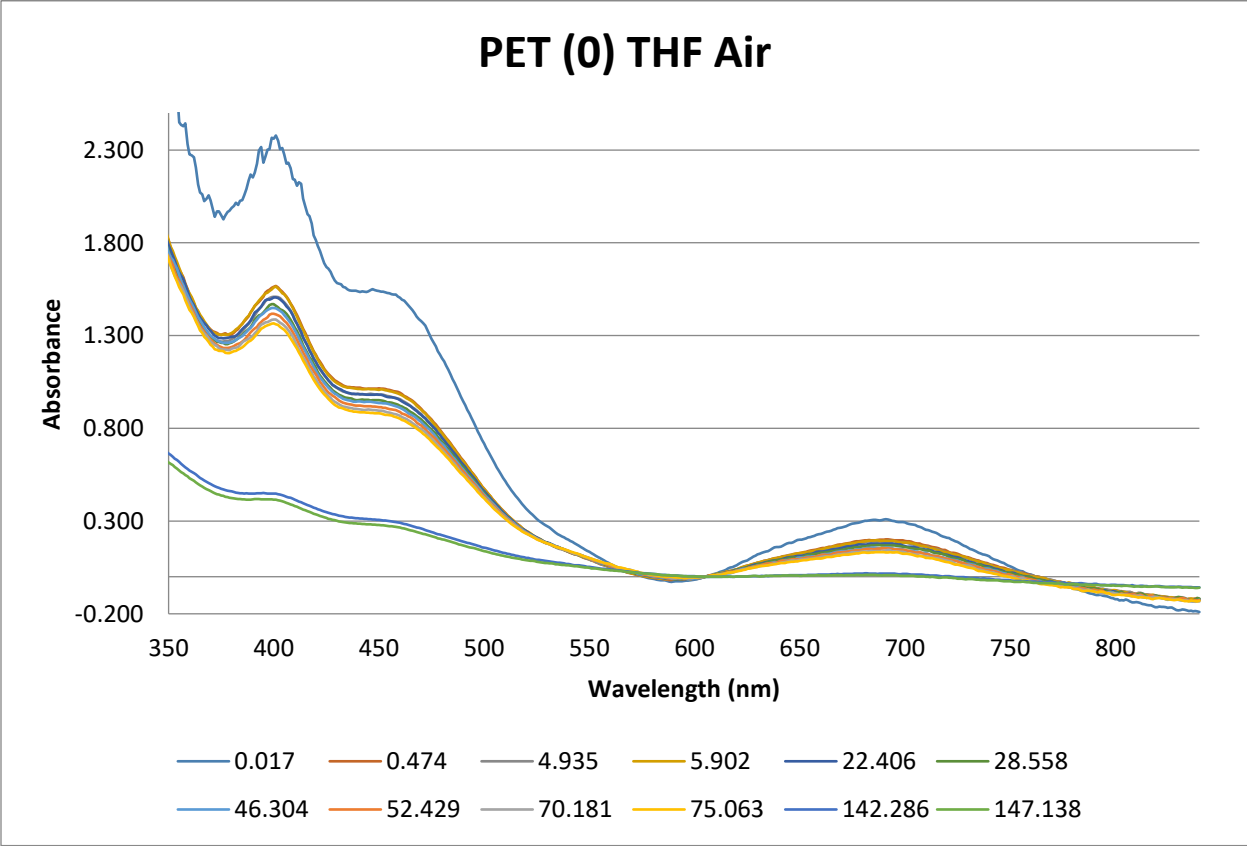



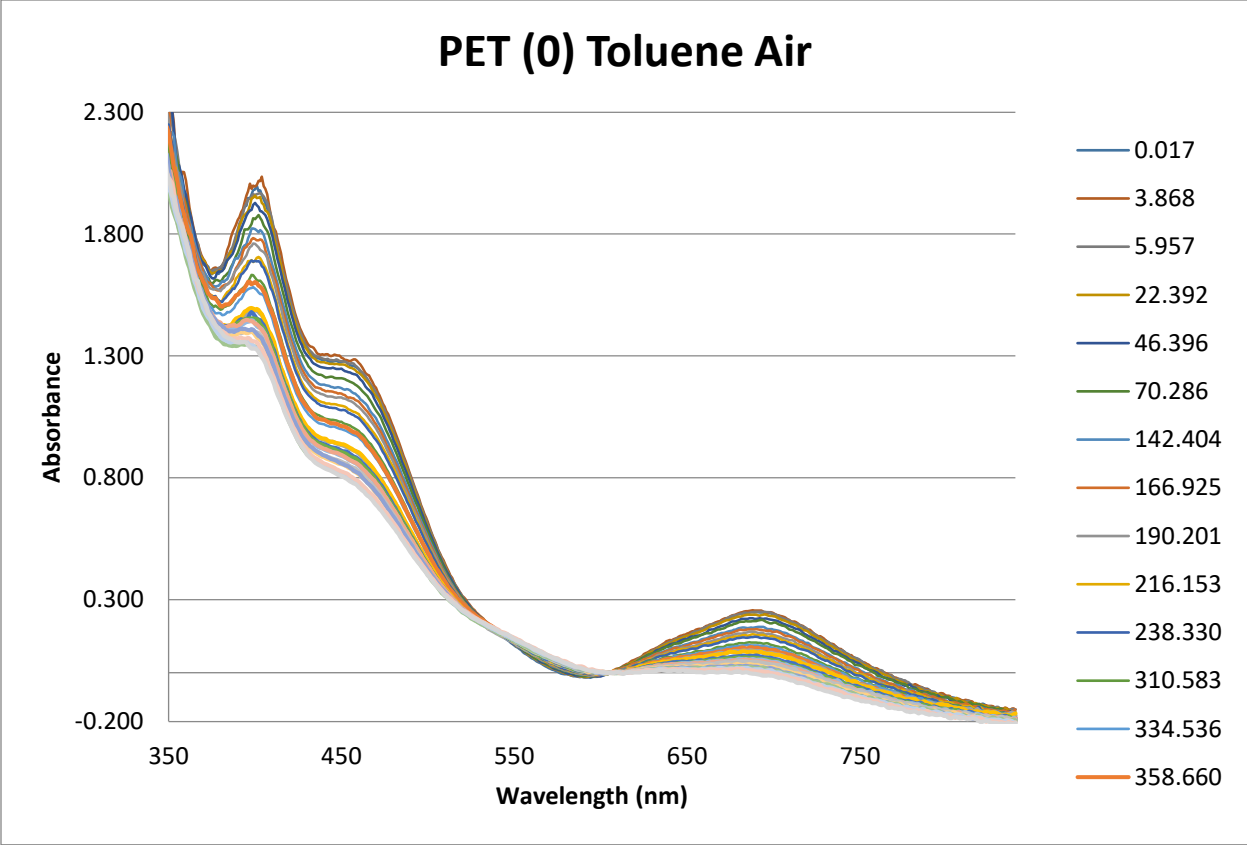

Decomposition of 0 charge state with different ligand in DCM under argon

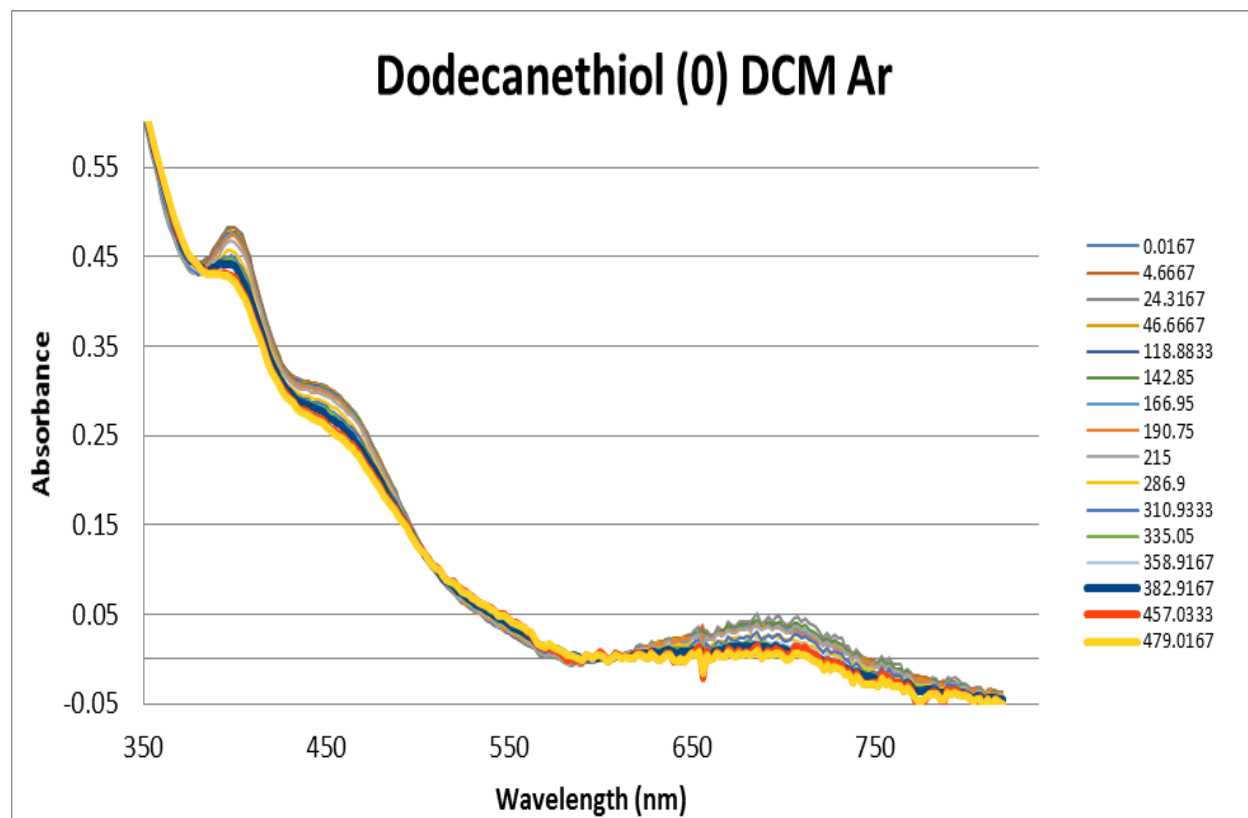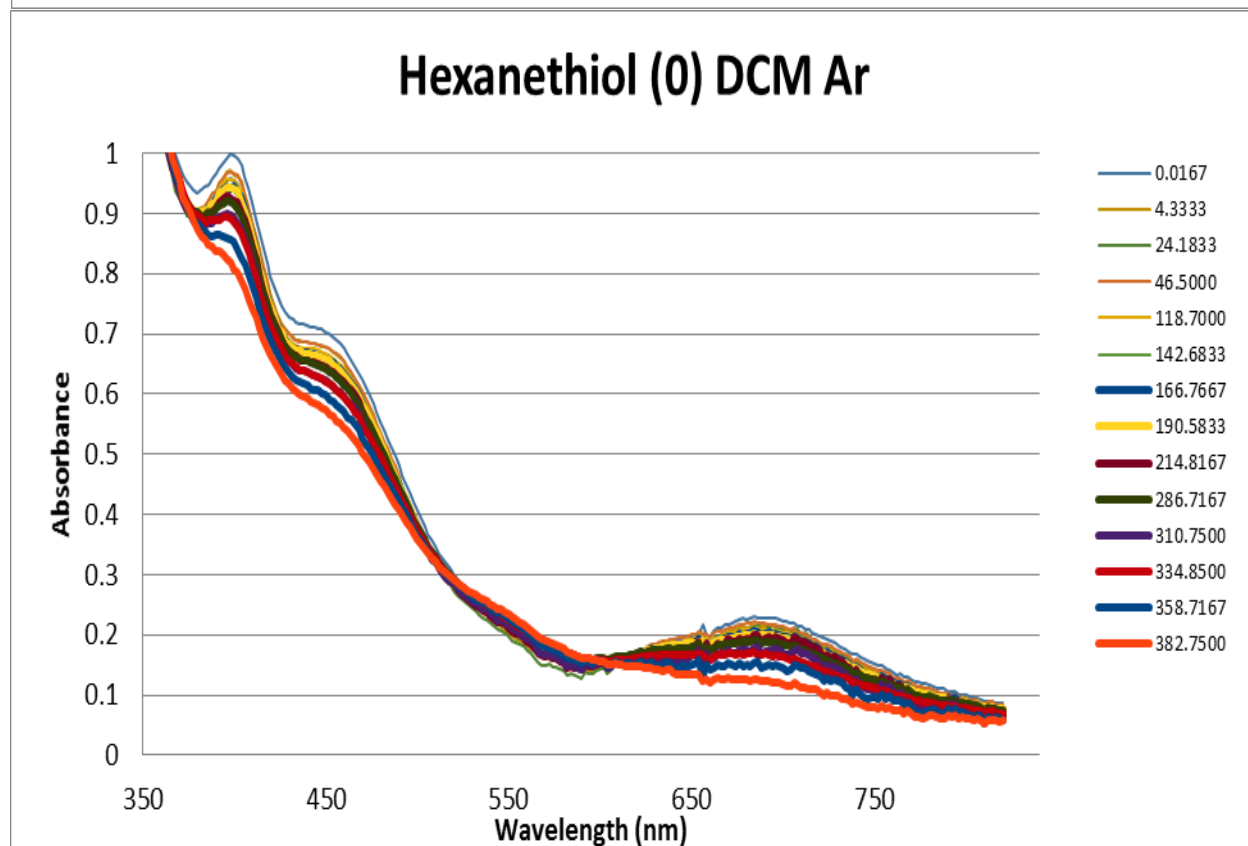

### Ethanthiol (0) DCM Ar

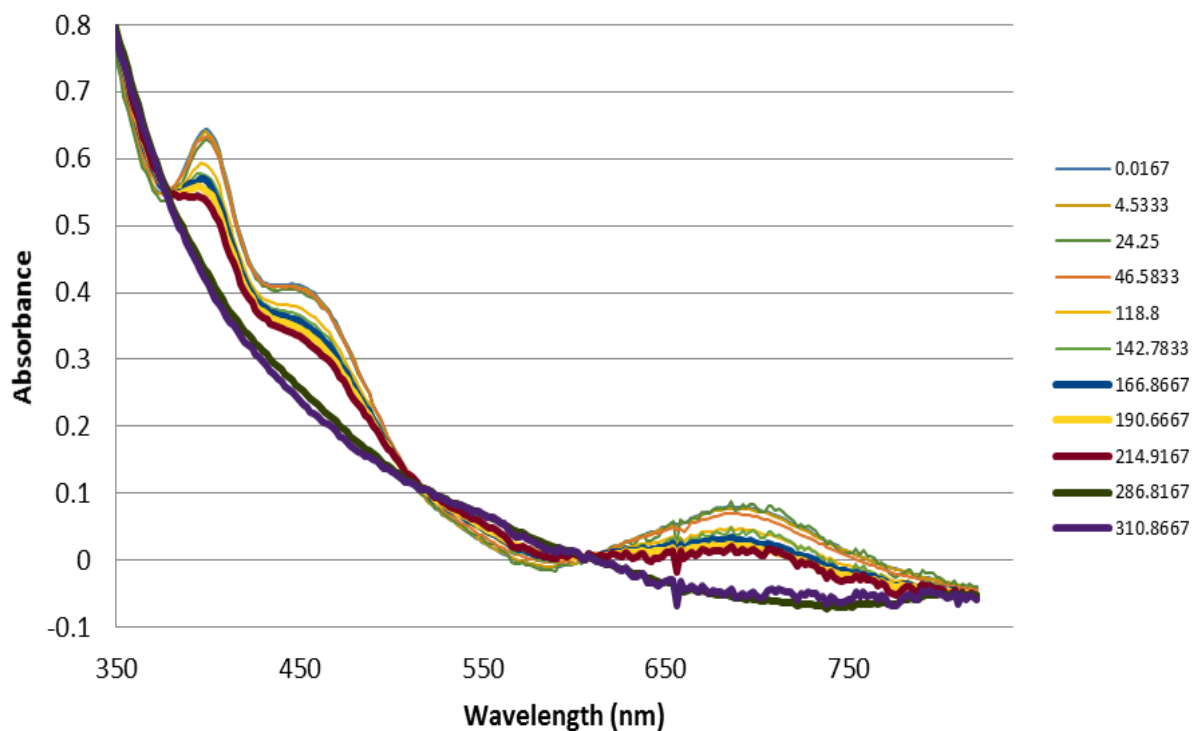

### Octanethiol (0) DCM Ar

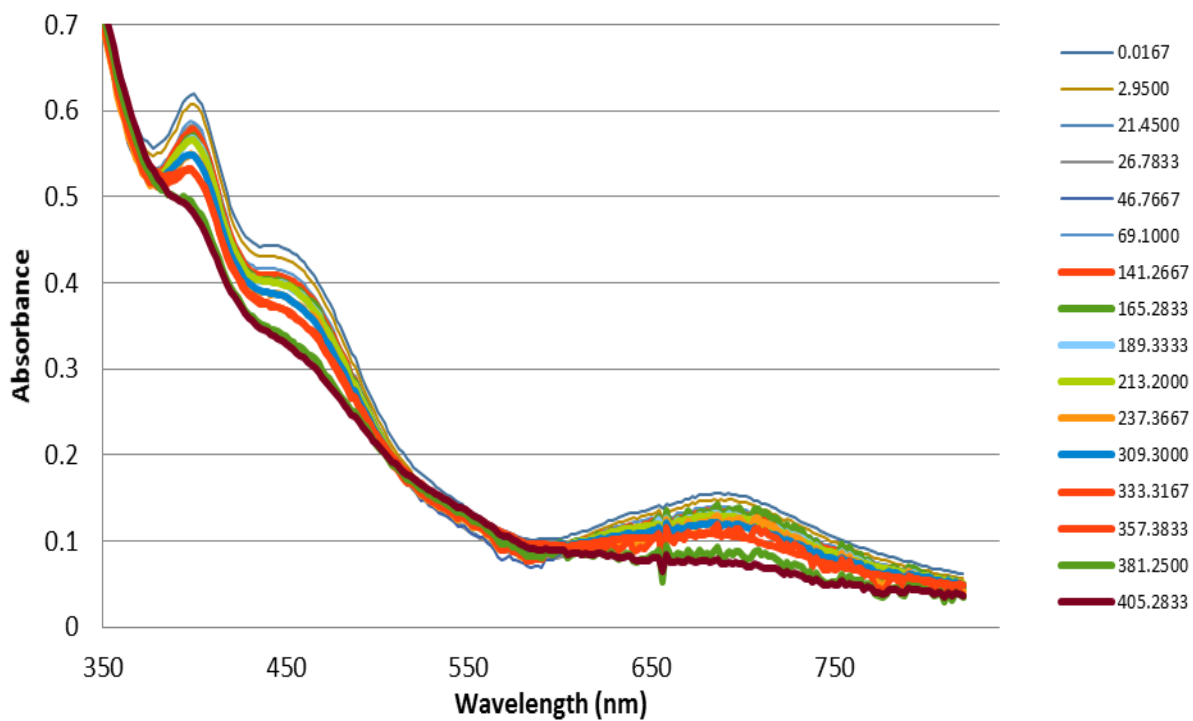

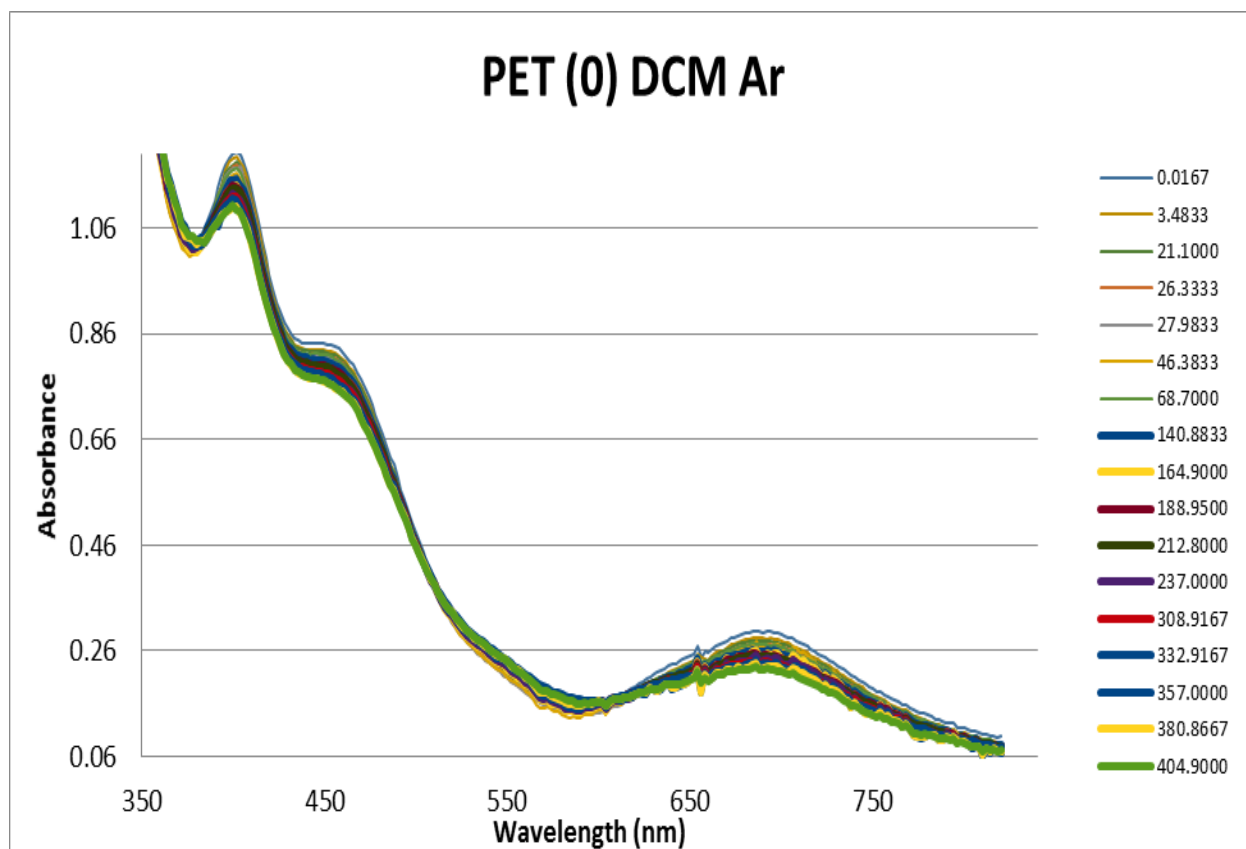

### Linear fits of rate laws to the absorbance data

Concentration was calculated using the molar absorptivity of  $8800 \text{ cm}^{-1}\text{M}^{-1}$  at 680nm. This concentration data was then fit to integrated rate laws using Microsoft Excel and the best fits were chosen to report the reactant order of gold for that set of conditions. The graphs are labeled with the ligand layer charge state solvent then atmosphere.

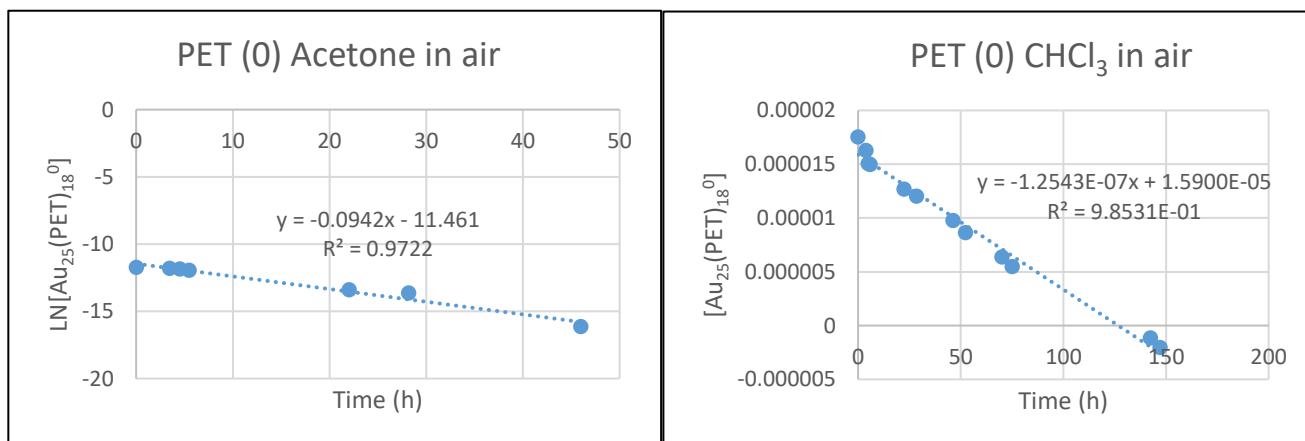

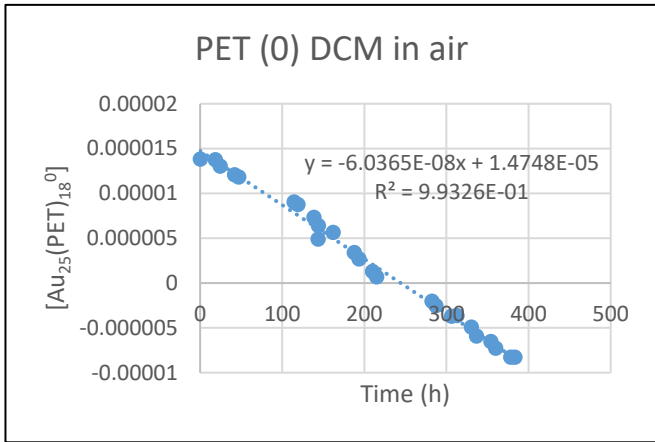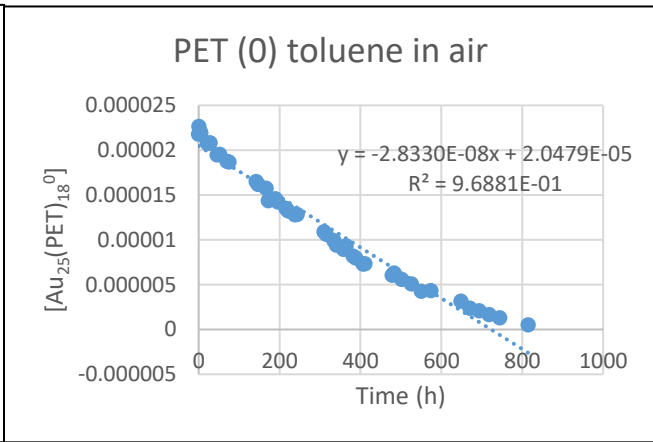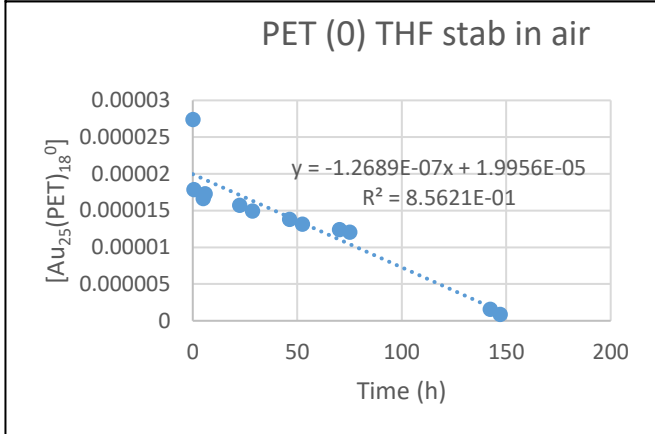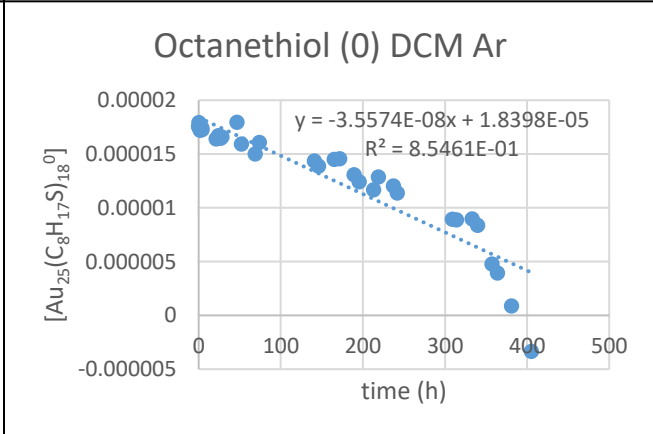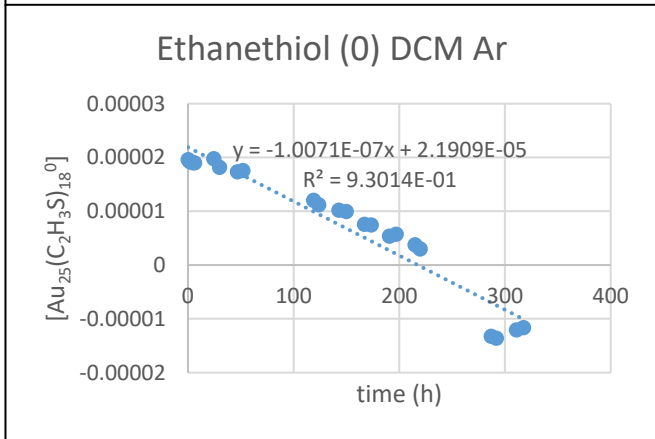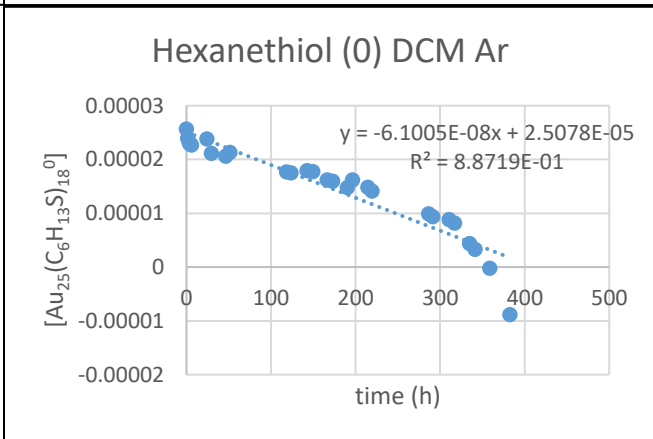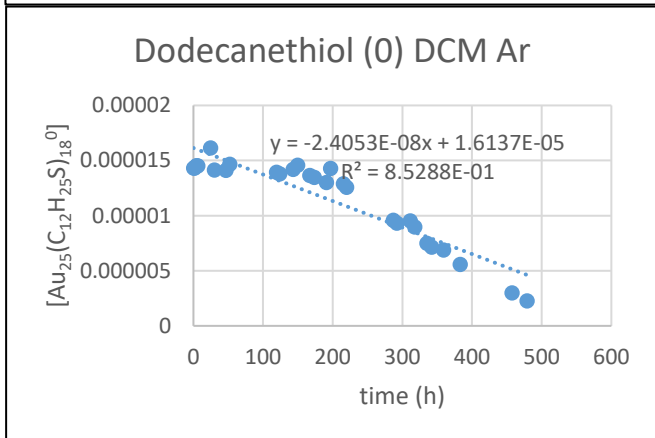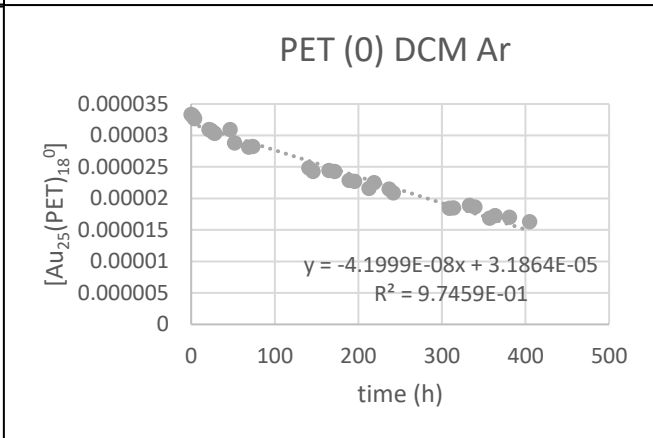

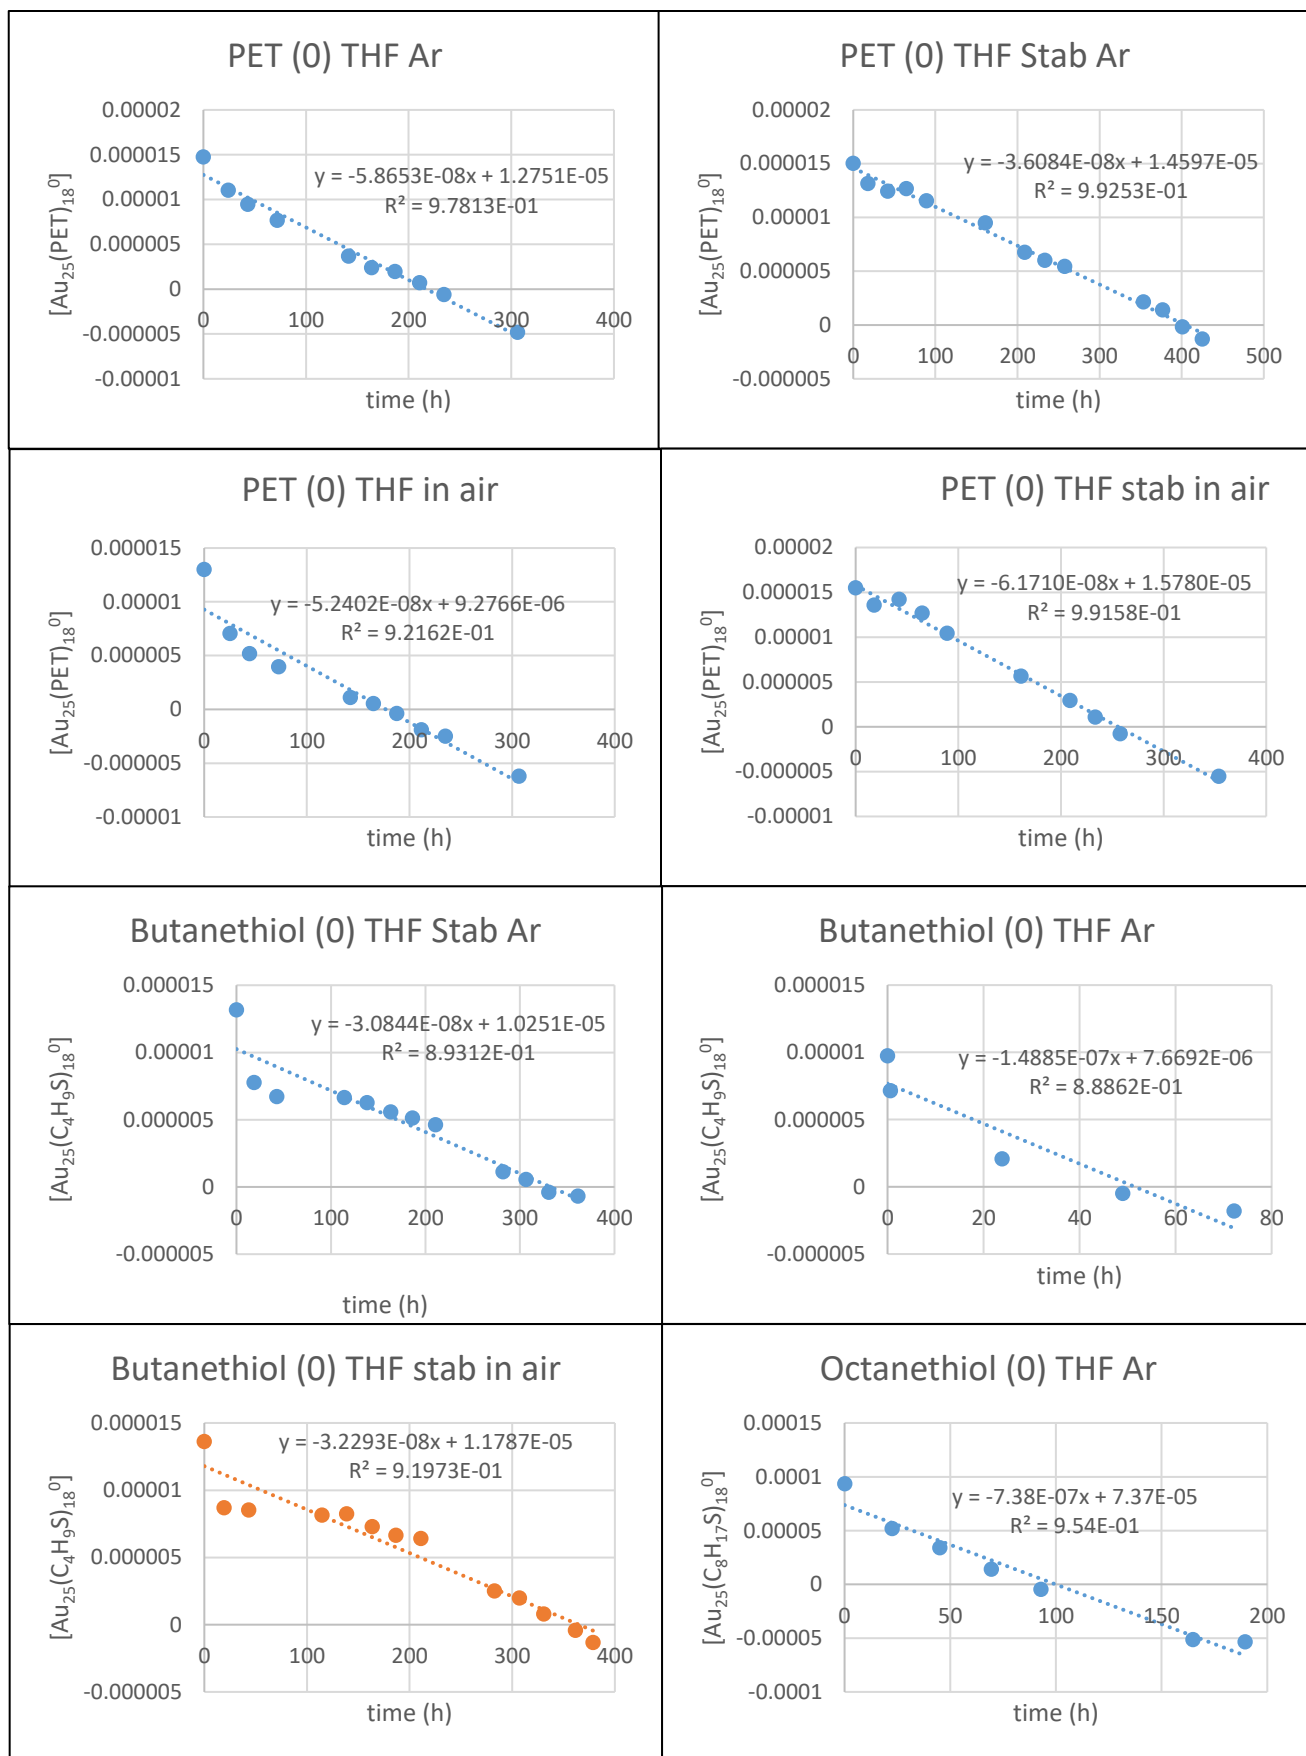

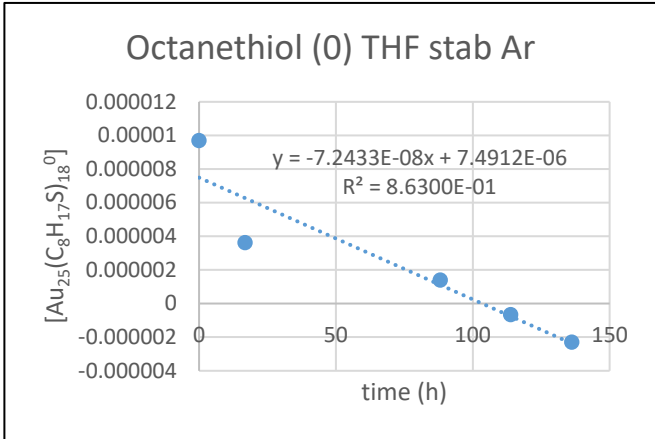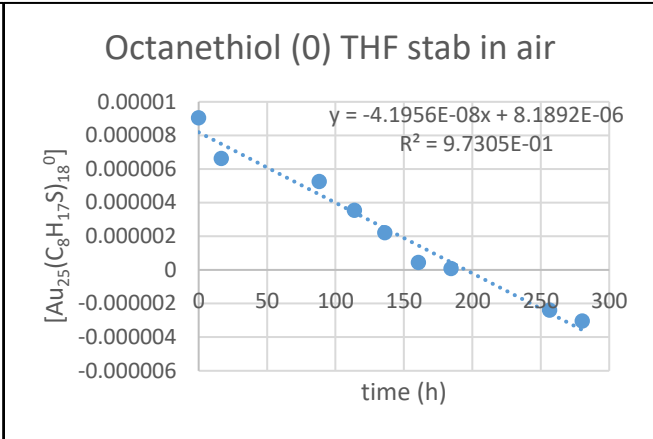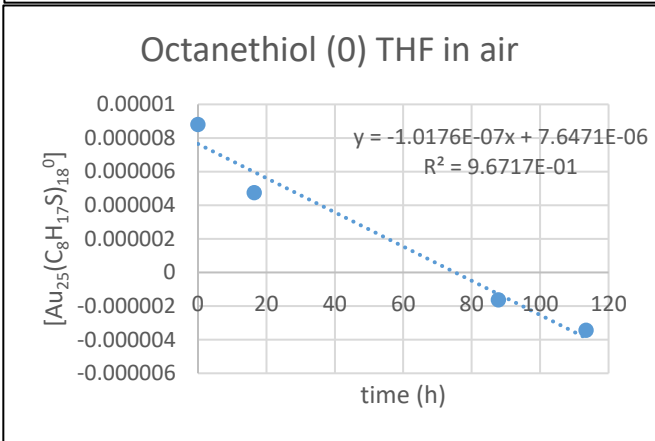

Conditions resulting in little to no decay over ~20 days observed

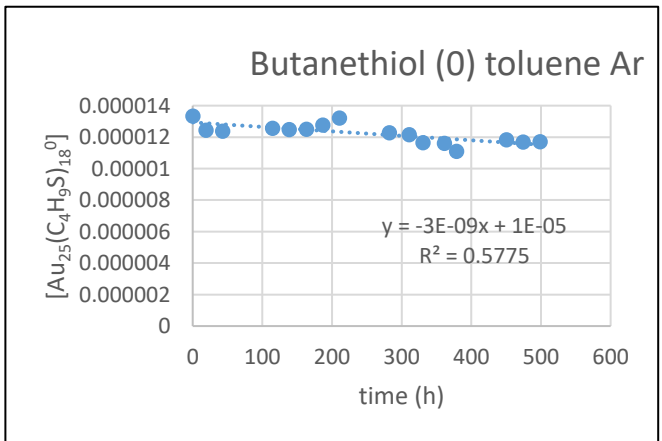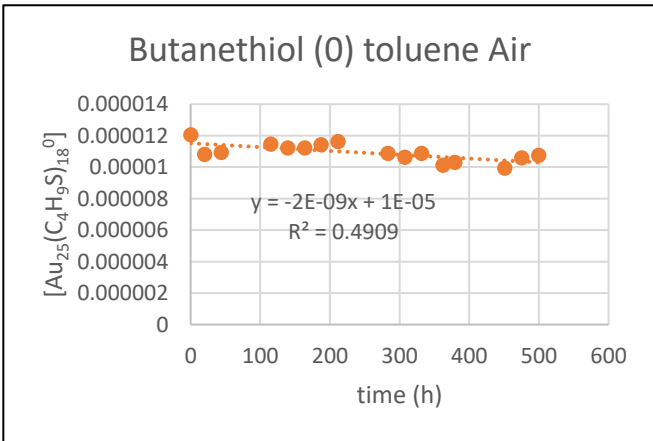

### Summary of reactant order determination

| Ligand        | Atm | Charge | solvent  | order for cluster | rate constant k | [A]0 (M) | Half life (h) |
|---------------|-----|--------|----------|-------------------|-----------------|----------|---------------|
| PET           | air | 0      | Acetone  | 1st               | 0.0942          | 8E-06    | 7.35825032    |
| PET           | air | 0      | CHCl3    | 0th               | 1.254E-07       | 1.8E-05  | 69.9277464    |
| PET           | air | 0      | DCM      | 0th               | 6.04E-08        | 1.4E-05  | 114.517995    |
| PET           | air | 0      | THF      | 0th               | 1.27E-07        | 2.7E-05  | 107.820329    |
| PET           | air | 0      | Toluene  | 0th               | 2.83E-08        | 2.2E-05  | 384.403513    |
| Ethanethiol   | Ar  | 0      | DCM      | 0th               | 1.0071E-07      | 2E-05    | 97.3768065    |
| hexanethiol   | Ar  | 0      | DCM      | 0th               | 6.1005E-08      | 2.6E-05  | 210.272134    |
| octanethiol   | Ar  | 0      | DCM      | 0th               | 3.5574E-08      | 1.8E-05  | 246.498549    |
| dodecanethiol | Ar  | 0      | DCM      | 0th               | 2.4053E-08      | 1.4E-05  | 297.63817     |
| PET           | Ar  | 0      | DCM      | 0th               | 4.20E-08        | 3.33E-05 | 396.744656    |
| hexanethiol   | Ar  | -1     | DCM      | 0th               | 1.1223E-07      | 2.5E-05  | 110.602145    |
| PET           | Ar  | -1     | DCM      | 0th               | 3.42E-08        | 3.5E-05  | 511.806663    |
| PET           | air | -1     | Acetone  | 1st               | 0.0147          | 1.6E-05  | 47.1528694    |
| PET           | air | -1     | CHCl3    | 0th               | 9.96E-08        | 1.6E-05  | 81.5378285    |
| PET           | air | -1     | DCM      | 0th               | 1.48E-07        | 1.9E-05  | 63.156831     |
| PET           | air | -1     | MeCN     | 1st               | 0.0591          | 1.7E-05  | 11.7283787    |
| PET           | air | -1     | THF stab | 0th               | 2.14E-08        | 1.6E-05  | 365.628776    |
| PET           | air | -1     | Toluene  | 0th               | 7.48E-08        | 1.3E-05  | 86.635093     |

### Differential Scanning calorimetry data

All differential calorimetry scanning measurements (DSC) were taken using TA Instrument's 2920 modulated DSC. All products were re-dissolved in a minimal amount of DCM and then deposited into an aluminum hermetic DSC pan and allowed to air dry in order to achieve uniform coverage of the pan. Once the products were dry enough to stick to the DSC pan they were put under vacuum for 10 min to ensure the complete removal of the solvent.



### Hexanethiol (0) DSC

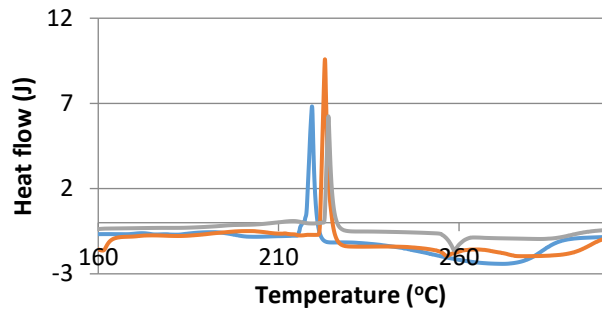

### Hexanethiol (-1) DSC

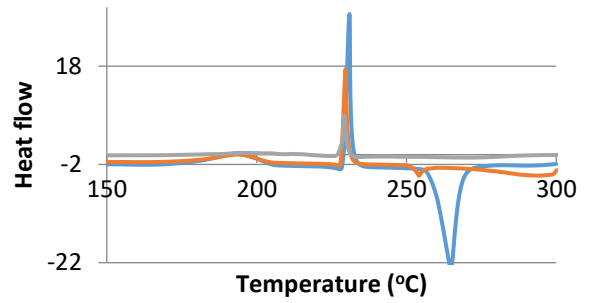

### PET (0) DSC

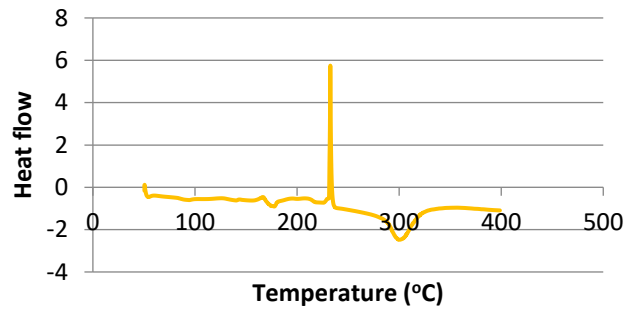

### PET (-1) DSC

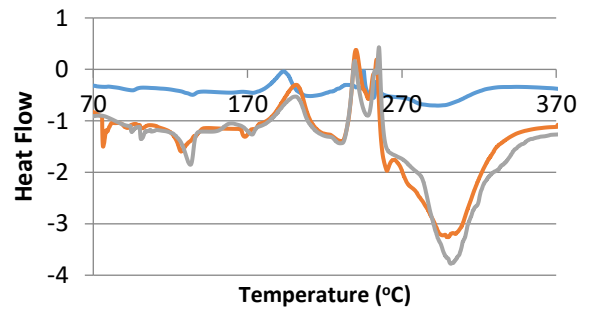

### Propanethiol (0) DSC

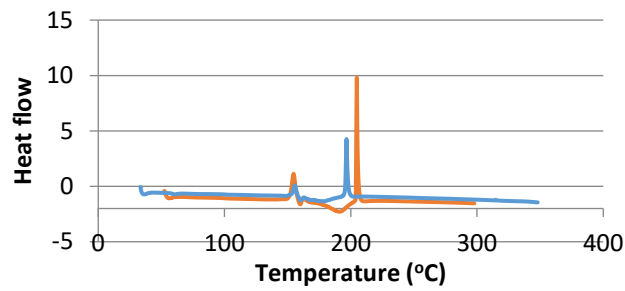

### Propanethiol (-1) DSC

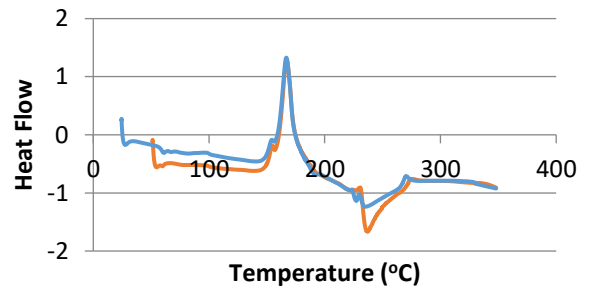

### Ethanethiol (-1) DSC

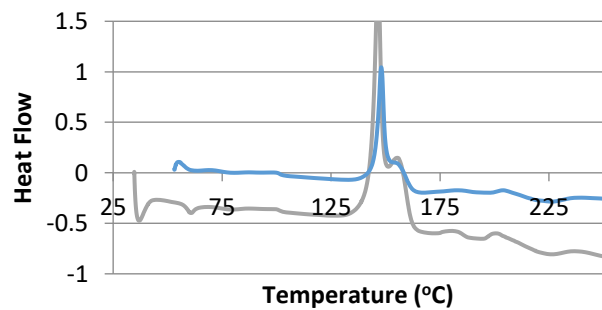

Supplement: c7ra07511a1.pdf [file c7ra07511a1.pdf]
